# Supplementary material
Source: PubMed Central journal article supplement (PMC6445702)
Supplement: NIHMS1515325-supplement-1.pdf [file NIHMS1515325-supplement-1.pdf]

Supplementary Figure S1

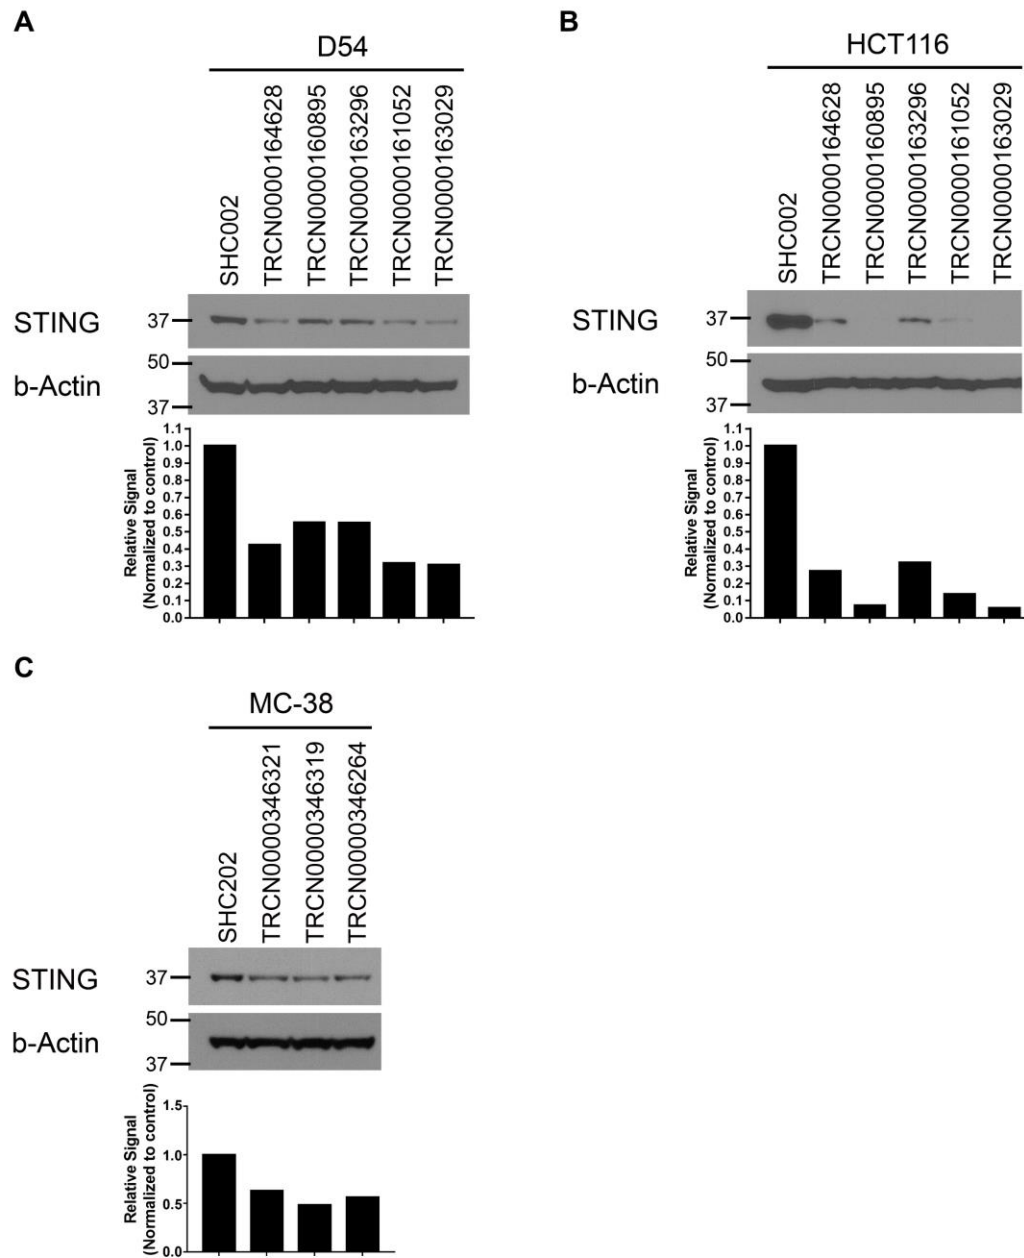

**Supplementary Figure S1. shRNA constructs targeting STING have varying effects on different tumor cell lines.** Western blot analysis of multiple stable D54 (A), HCT116 (B), and MC-38 (C) cell lines expressing short hairpin RNAs targeting STING or scrambled control (SHCOO2). Quantified bands are shown below each of their respective Western blot panels.
