# Supplementary material
Source: PubMed Central journal article supplement (PMC6445702)
Supplement: NIHMS1515325-supplement-2.pdf [file NIHMS1515325-supplement-2.pdf]

Supplementary Figure S2

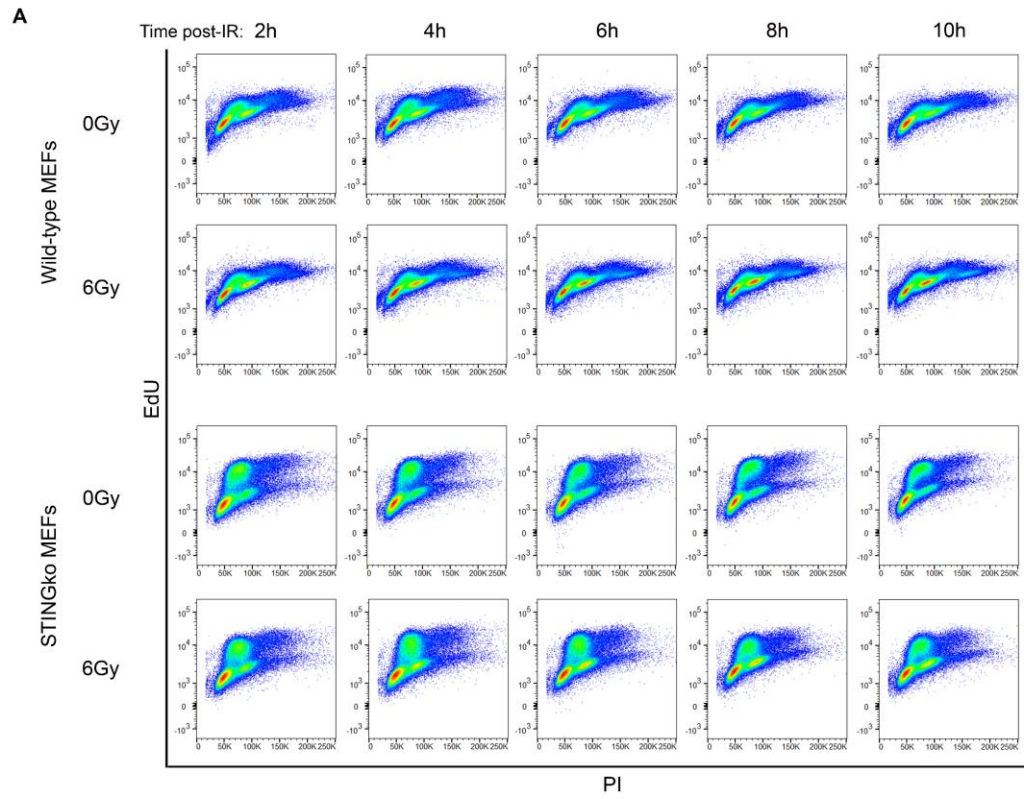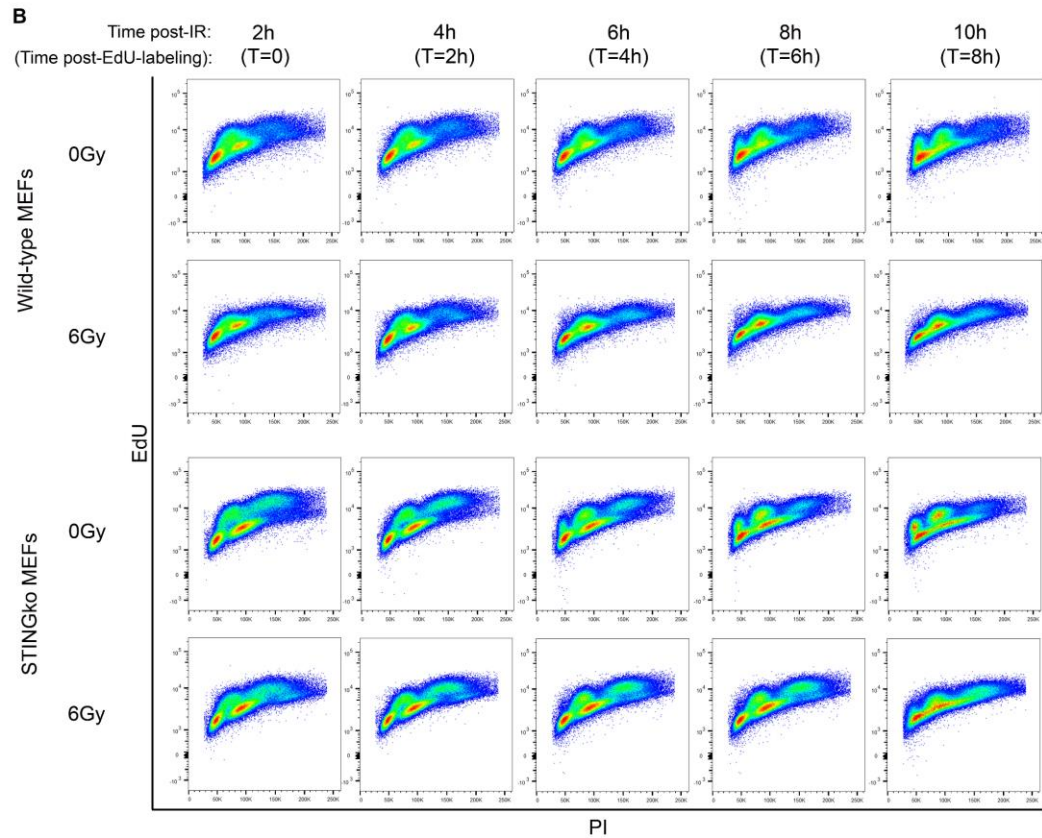

**Supplementary Figure S2. STING-dependent regulation of proliferation is associated with perturbations of cell cycle.** Cell cycle profile of pulse EdU-labeled (A) and chase EdU-labeled (B) WT and *STING*<sup>-/-</sup> MEFs at different time points post-IR treatment. Flow cytometry was used to measure the percent cell population in G1, S, and G2/M phase of single cells stained with AlexaFluor 647-conjugated anti-EdU (y-axis) and PI (x-axis).
