# Supplementary material
Source: PubMed Central journal article supplement (PMC6445702)
Supplement: NIHMS1515325-supplement-3.pdf [file NIHMS1515325-supplement-3.pdf]

### Supplementary Figure S3

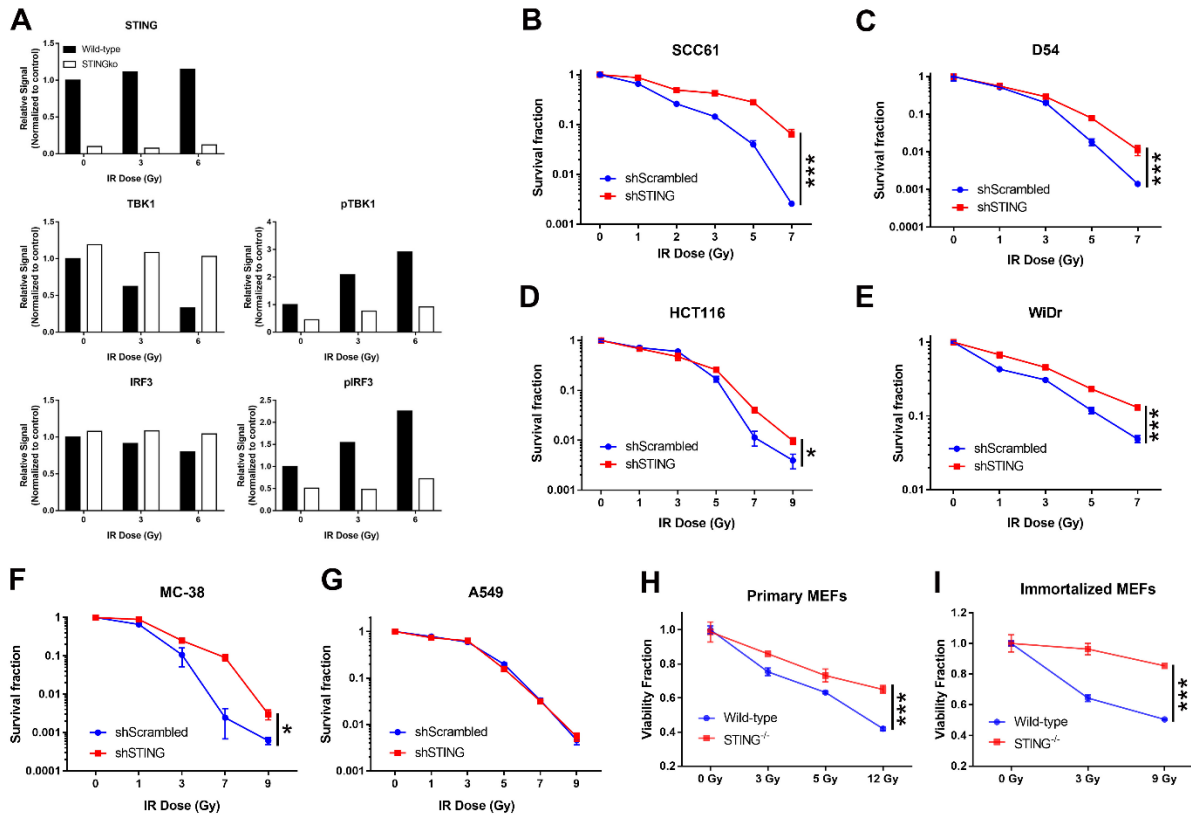

**Supplementary Figure S3. STING confers radiosensitivity in a variety of human and mice cell lines.** (A) Quantification of bands from Western gel shown in Main Figure 3A using Image J. The pixel units obtained for each protein band was normalized to the pixel units calculated from their respective b-Actin loading control. For phosphorylated proteins, we then quantified the fraction of phosphorylated proteins to the absolute total amount of protein (total protein + phosphorylated protein). For dose-dependent and stimulation assays, the variables tested were normalized to their respective wild-type unstimulated controls. (B-G) Clonogenic survival of various human and mice tumor cell lines with stable shSTING knockdown in response to increasing dose of IR. (H-I) Cell viability assays of primary and immortalized MEFs isolated from WT and STING<sup>-/-</sup> mice in response to increasing IR dose. Data are representative of at least

three experiments. P-values were determined using unpaired Student's t-test. Error bars are SEM. \*P < 0.05, \*\*P < 0.01, \*\*\*P < 0.005.
