# Supplementary material
Source: PubMed Central journal article supplement (PMC6445702)
Supplement: NIHMS1515325-supplement-5.pdf [file NIHMS1515325-supplement-5.pdf]

# Supplementary Figure S5

**A**

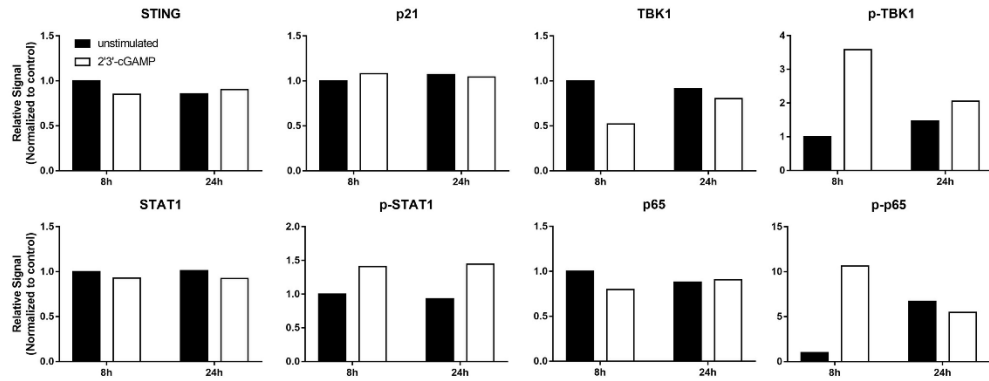

**B**

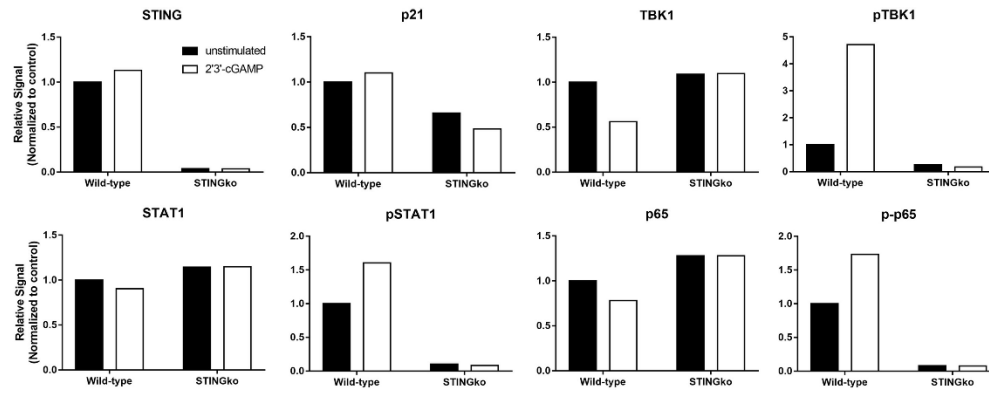

**C**

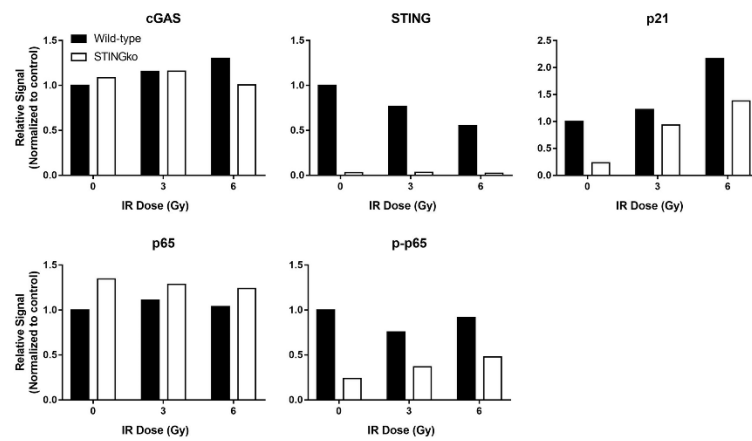

**D**

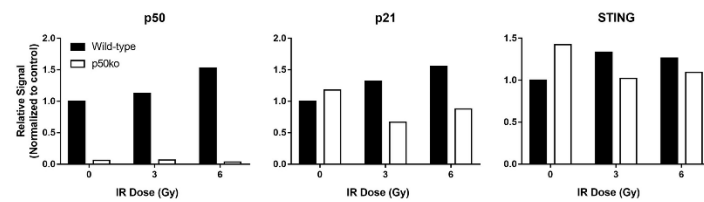

**Supplementary Figure S5. Quantification of Western blot bands using Image J.** The pixel units obtained for each protein band from Western gels shown in Main Figures 4B (**A**), 4C (**B**), 4D (**C**), and 4E (**D**) was normalized to the pixel units calculated from their respective b-Actin loading control. For phosphorylated proteins, we then quantified the fraction of phosphorylated proteins to the absolute total amount of protein (total protein + phosphorylated protein). For dose-dependent and stimulation assays, the variables tested were normalized to their respective wild-type unstimulated controls.
