# Supplementary material
Source: PubMed Central journal article supplement (PMC6445702)
Supplement: NIHMS1515325-supplement-6.pdf [file NIHMS1515325-supplement-6.pdf]

Supplementary Figure S6

Immortalized MEFs  
+ 1.5ug/ml Cytochalasin B

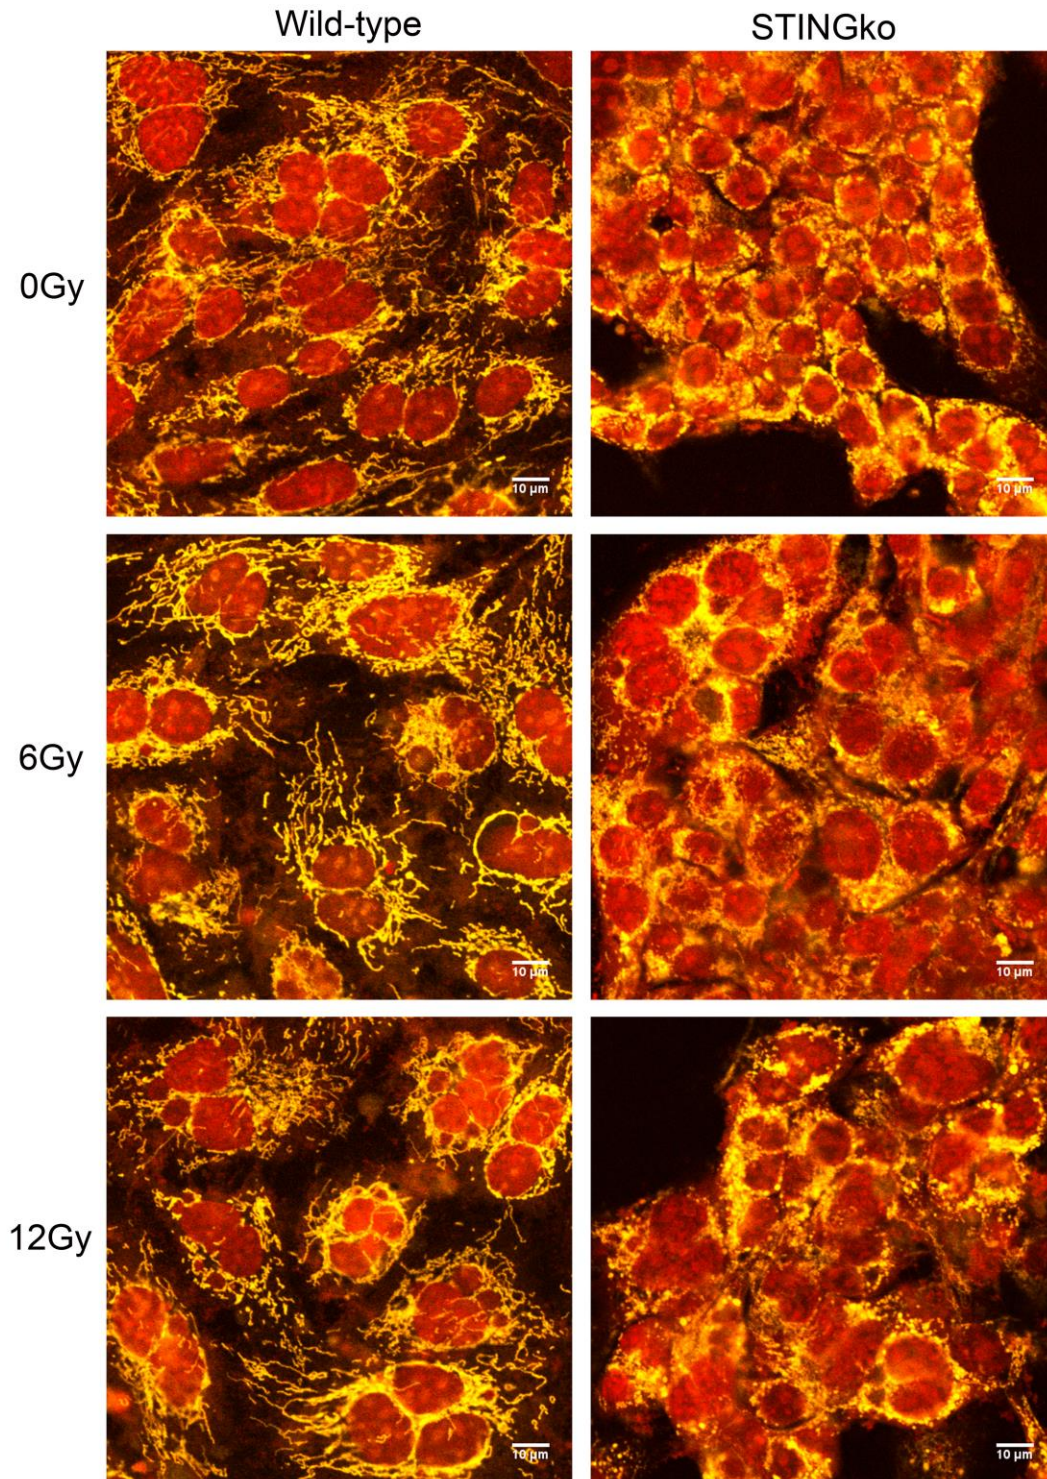

**Supplementary Figure S6. Ionizing radiation induces micronuclei formation in both WT and STING<sup>-/-</sup> MEFs.** WT and STING<sup>-/-</sup> MEFs examined by cytokinesis-block micronucleus (CBMN) assay by treatment with IR, then cytochalasin at 24 hours and then fixed and stained for DNA and mitochondrial/cytoplasmic compartments using Draq5 and MitoTracker Red at 48 hours. Scale bar, 10  $\mu$ m.
