# Supplementary material
Source: PubMed Central journal article supplement (PMC6445702)
Supplement: NIHMS1515325-supplement-7.pdf [file NIHMS1515325-supplement-7.pdf]

Supplementary Figure S7

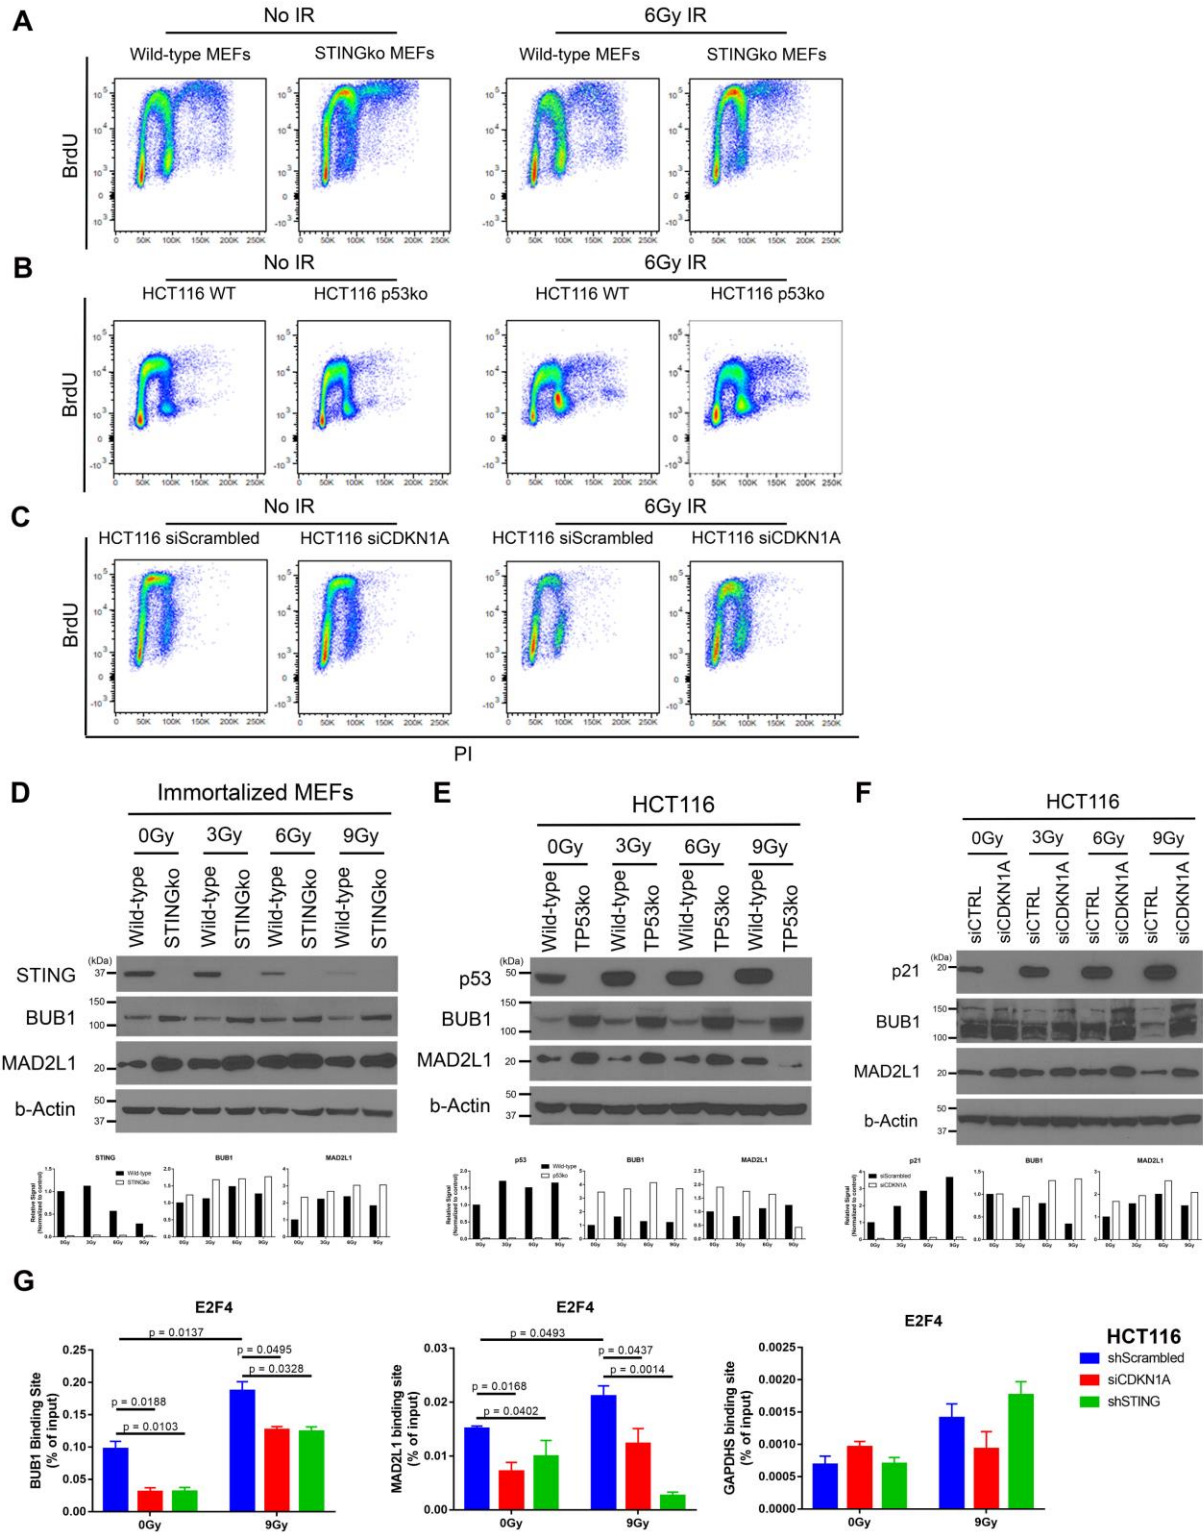

**Supplementary Figure S7. The absence of STING (or p53 or p21) leads to increase in BUB1 and MAD2L1 expression.** (A-C) BrdU/PI cell cycle profile of MEFs (A), p53<sup>-/-</sup> HCT116 (B), and CDKN1A-depleted HCT116 cells (C) at 24 hours post-IR. Flow cytometry was used to measure the percent cell population in G1, S, and G2/M phase of single cells stained with FITC-conjugated anti-BrdU (y-axis) and PI (x-axis). (D-F) Western analyses of lysates from WT and STING<sup>-/-</sup> immortalized MEFs (D), p53-negative HCT116 (E), and siCDKN1A HCT116 (F) probed for mitotic proteins BUB1 and MAD2L1 at 48 hours post-exposure to increasing IR doses. Quantified bands are shown below each of their respective Western blot panels. (G) ChIP analyses reveal that in the absence of either p21 or STING, E2F4 does not bind to the promoter region of BUB1 and MAD2L1 in HCT116 tumor cells. Data are representative of at least two experiments. P-values were determined using unpaired Student's t-test. Error bars are SEM. \*P < 0.05, \*\*P < 0.01, \*\*\*P < 0.005.
