# Supplementary material
Source: PubMed Central journal article supplement (PMC6445702)
Supplement: NIHMS1515325-supplement-8.pdf [file NIHMS1515325-supplement-8.pdf]

Supplementary Figure S8

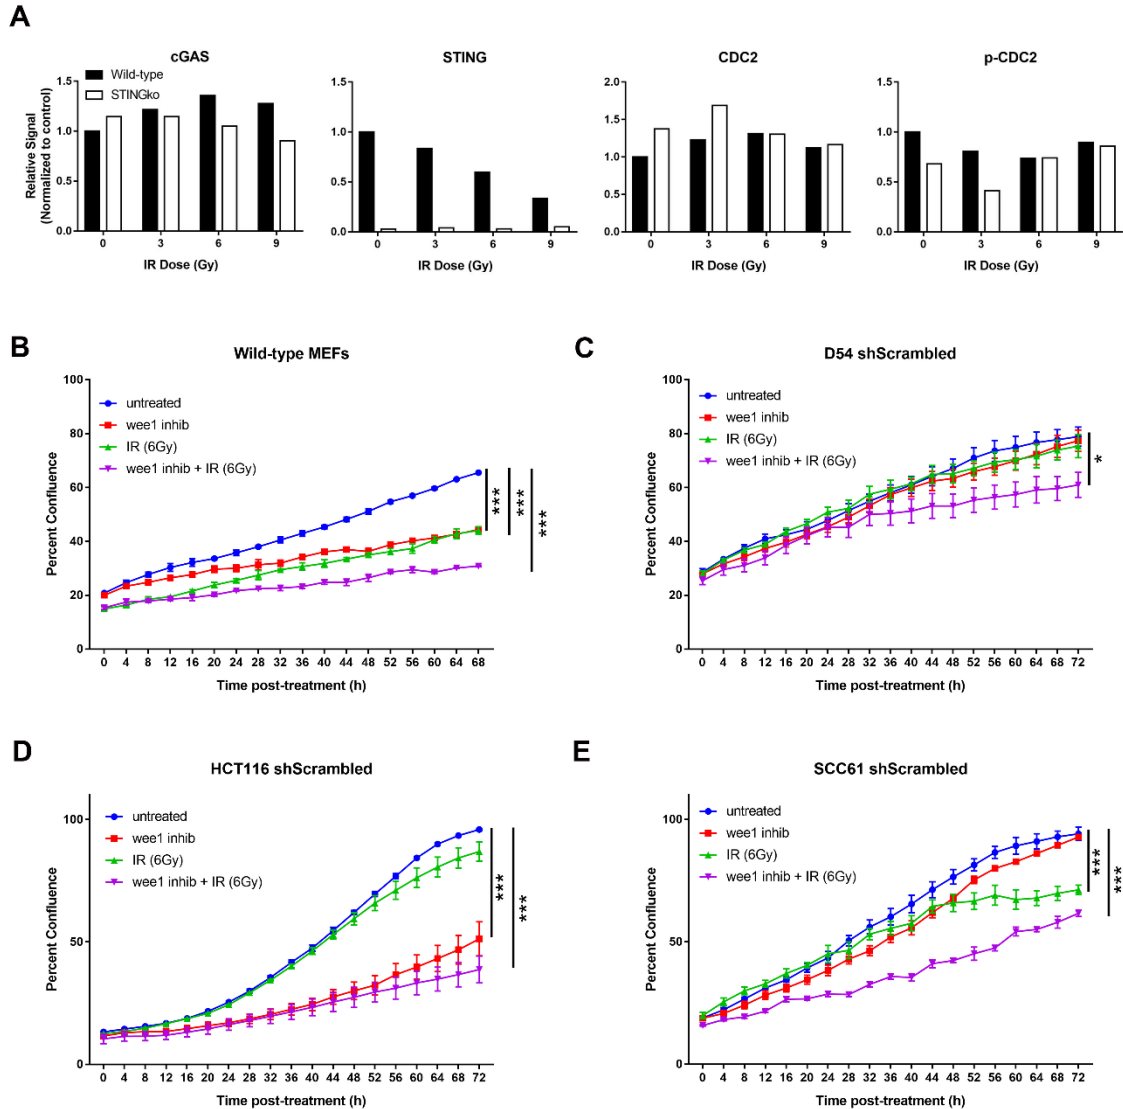

**Supplementary Figure S8. WEE1 inhibitor in combination with IR inhibits cellular proliferation of normal and tumor cells.** (A) Quantification of bands from Western gel shown in Main Figure 5D using Image J. The pixel units obtained for each protein band was normalized to the pixel units calculated from their respective b-Actin loading control. (B-E) Kinetic analysis of WT MEFs (B) as well as shScrambled D54 (C), HCT116 (D), and SCC61 (E) proliferation *in vitro* were measured over time in response to WEE1 inhibitor MK1775 ± IR (6 Gy) using the

IncuCyte live cell imaging system. *In vitro* growth curve data are representative of at least three experiments, each with  $n = 3$  per group. P-values were determined using unpaired Student's t-test. Error bars are SEM. \* $P < 0.05$ , \*\* $P < 0.01$ , \*\*\* $P < 0.005$ .
